# Supplementary material
Source: PubMed Central journal article supplement (PMC3338888)
Supplement: NIHMS366009-supplement-1_si_001.pdf [file NIHMS366009-supplement-1_si_001.pdf]

# Totopotensamides, Polyketide-Cyclic Peptide Hybrids from a Mollusk-Associated Bacterium *Streptomyces* sp.

Zhenjian Lin,<sup>†</sup> Malem Flores,<sup>‡</sup> Imelda Forteza,<sup>‡</sup> Niel Henriksen,<sup>†</sup> Gisela P.  
Concepcion,<sup>‡</sup> Gary Rosenberg,<sup>§</sup> Margo G. Haygood,<sup>⊥</sup> Baldomero M. Olivera,<sup>⊥</sup> Alan  
Light,<sup>∇</sup> Thomas E. Cheatham, III,<sup>†</sup> and Eric W. Schmidt<sup>\*,†,⊥</sup>

<sup>†</sup> College of Pharmacy, Medicinal Chemistry, Salt Lake City, Utah 84112 USA.

<sup>‡</sup> Marine Science Institute, University of the Philippines, Diliman, Quezon City 1101, Philippines.

<sup>§</sup> Academy of Natural Sciences, 1900 Benjamin Franklin Parkway, Philadelphia, PA 19103. USA

<sup>⊥</sup> Department of Environmental and Biomolecular Systems, OGI School of Science & Engineering,

Oregon Health & Science University, Beaverton, Oregon 97006, USA.

<sup>⊥</sup> Department of Biology, University of Utah, Salt Lake City, Utah 84112, USA

<sup>∇</sup> Department of Anesthesiology, University of Utah, Salt Lake City, Utah 84112, USA.

\*To whom correspondence should be addressed. Phone: (801) 585-5234. Fax: (801)

585-9119. E-mail: [ews1@utah.edu](mailto:ews1@utah.edu)

**Figure S1.**  $^1\text{H}$  NMR spectrum of compound 1 in  $\text{DMSO-}d_6$ .

**Figure S2.**  $^1\text{H}$  NMR spectrum of compound 1 in  $\text{CD}_3\text{OD}$ .

**Figure S3.**  $^{13}\text{C}$  NMR spectrum of compound 1 in  $\text{DMSO-}d_6$ .

**Figure S4.** HSQC spectrum of compound 1 in  $\text{DMSO-}d_6$ .

**Figure S5.** HMBC spectrum of compound 1 in  $\text{DMSO-}d_6$ .

**Figure S6.**  $^1\text{H-}^1\text{H}$  COSY spectrum of compound 1 in  $\text{DMSO-}d_6$ .

**Figure S7.** NOESY spectrum of compound 1 in  $\text{DMSO-}d_6$ .

**Figure S8.** 1D TOCSY spectrum of compound 1 in  $\text{CD}_3\text{OD}$ .

**Figure S9.**  $^1\text{H}$  NMR spectrum of compound 2 in  $\text{DMSO-}d_6$ .

**Figure S10.** HSQC spectrum of compound 2 in  $\text{DMSO-}d_6$ .

**Figure S11.** HMBC spectrum of compound 2 in  $\text{DMSO-}d_6$ .

**Figure S12.**  $^1\text{H-}^1\text{H}$  COSY spectrum of compound 2 in  $\text{DMSO-}d_6$ .

**Figure S13.** LC-MS Analysis of D/L-FDLA Derivatives.

**Figure S14.** LC-MS Analysis of L-FDAA Derivatives.

**Figure S15.** HRESIMS spectra of compounds 1 and 2.

**Figure S16.**  $^1\text{H}$  NMR spectrum of FDLA derivatives of Phg and DHPg in  $\text{CD}_3\text{OD-}d_4$ .

**Table S1.** The chemical differences of the  $\alpha$  protons of the Leu and Phgs.

**Figure S1.**  $^1\text{H}$  NMR spectrum of compound 1 in  $\text{DMSO-}d_6$ .

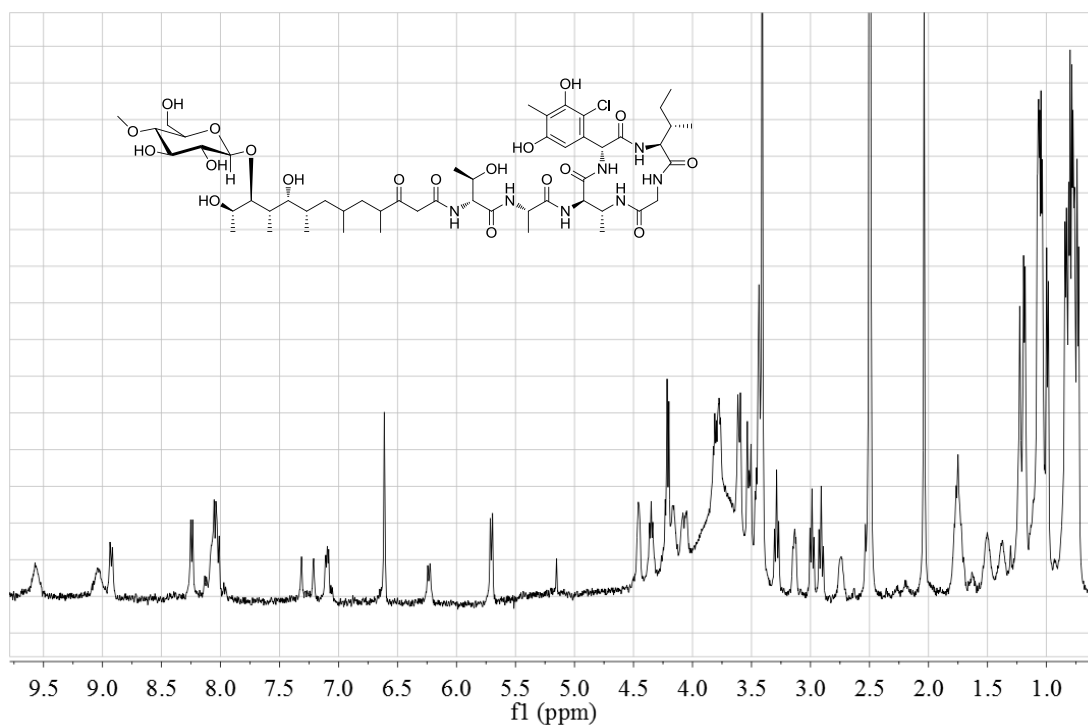

**Figure S2.**  $^1\text{H}$  NMR spectrum of compound 1 in  $\text{CD}_3\text{OD}$ .

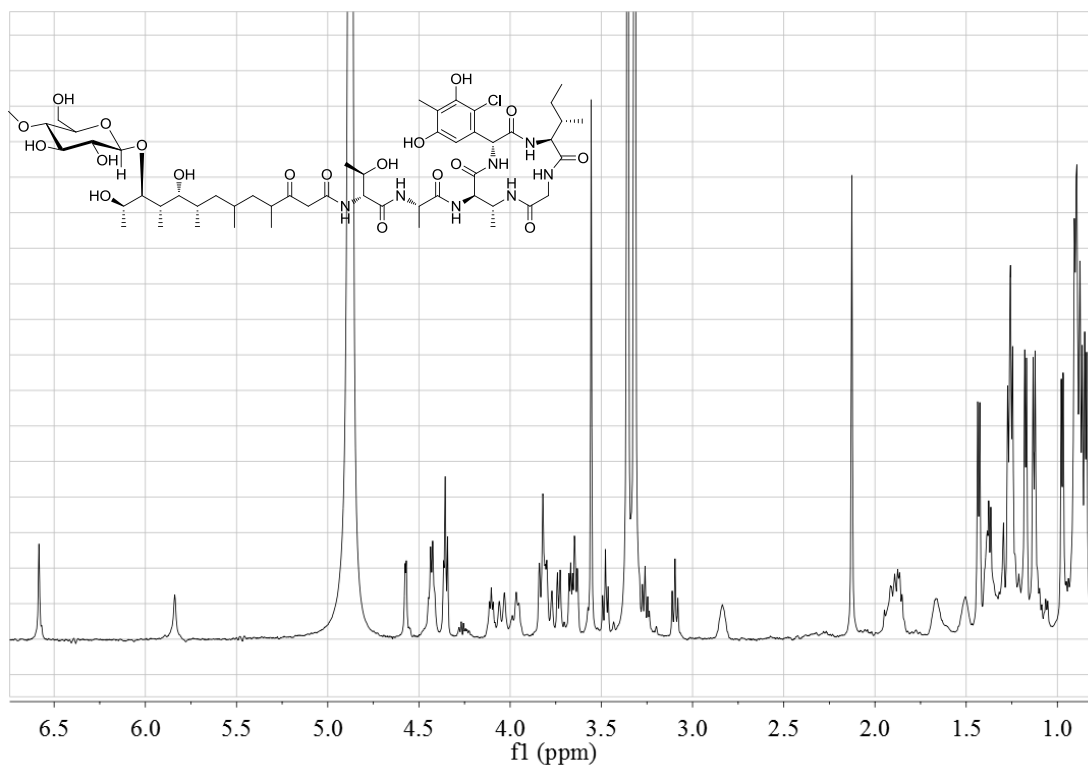

Figure S3.  $^{13}\text{C}$  NMR spectrum of compound 1 in  $\text{DMSO-}d_6$ .

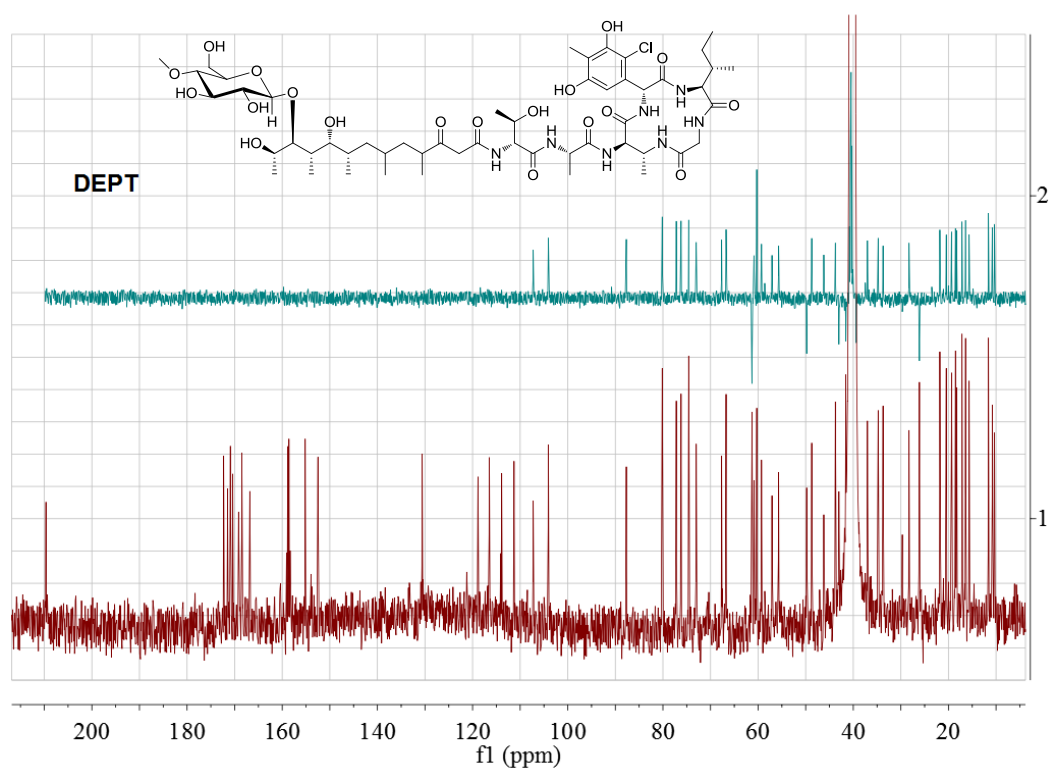

Figure S4. HSQC spectrum of compound 1 in  $\text{DMSO-}d_6$ .

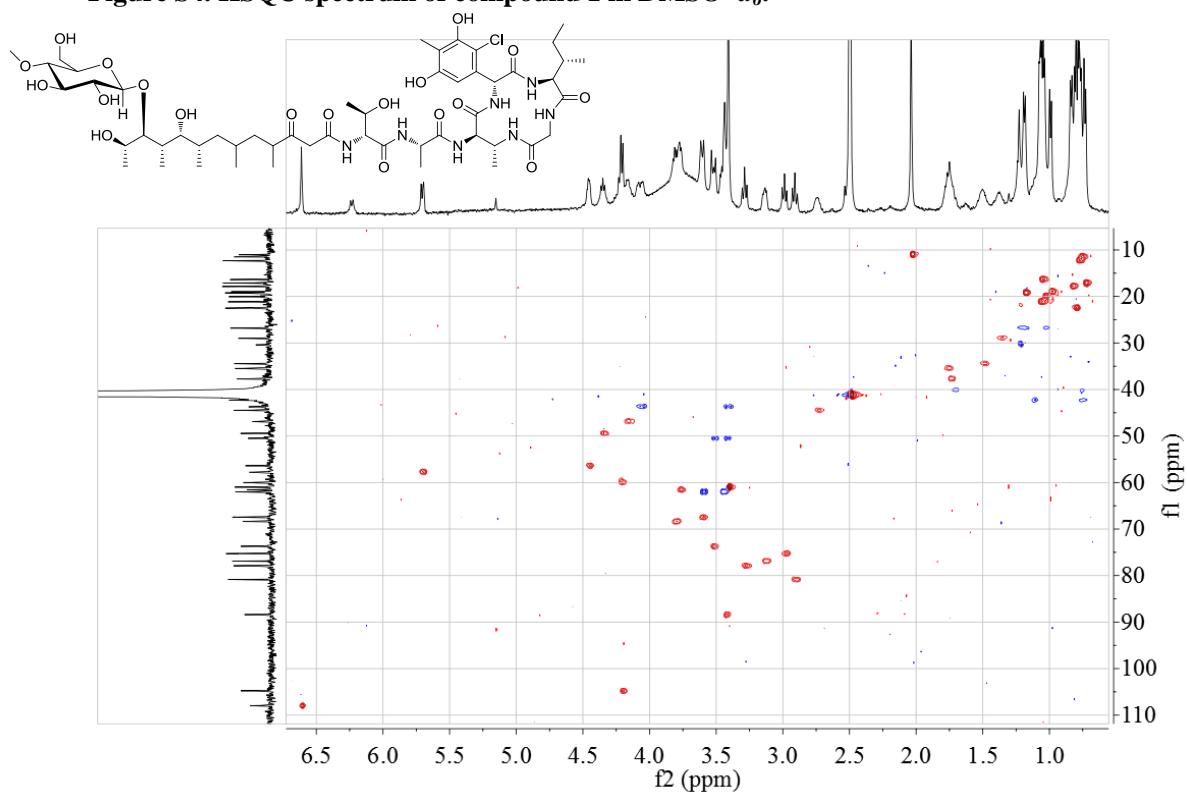

HSQC of 1 in CD<sub>3</sub>OD

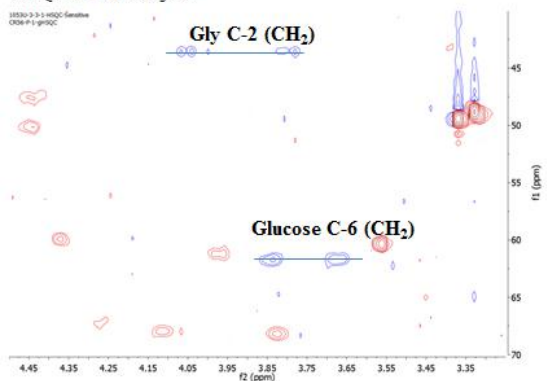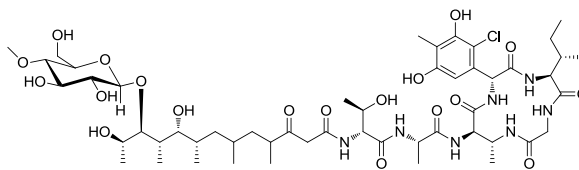

HSQC of 1 in DMSO-d<sub>6</sub>

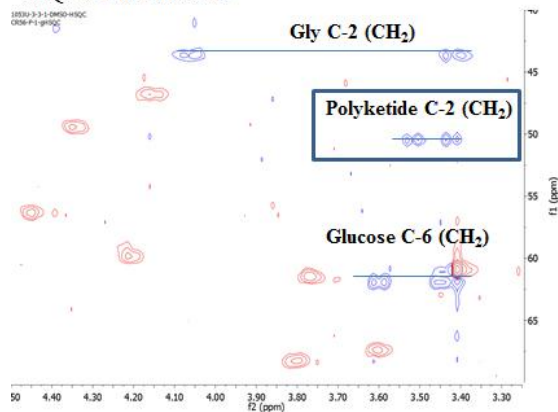

Figure S5. HMBC spectrum of compound 1 in DMSO-*d*<sub>6</sub>.

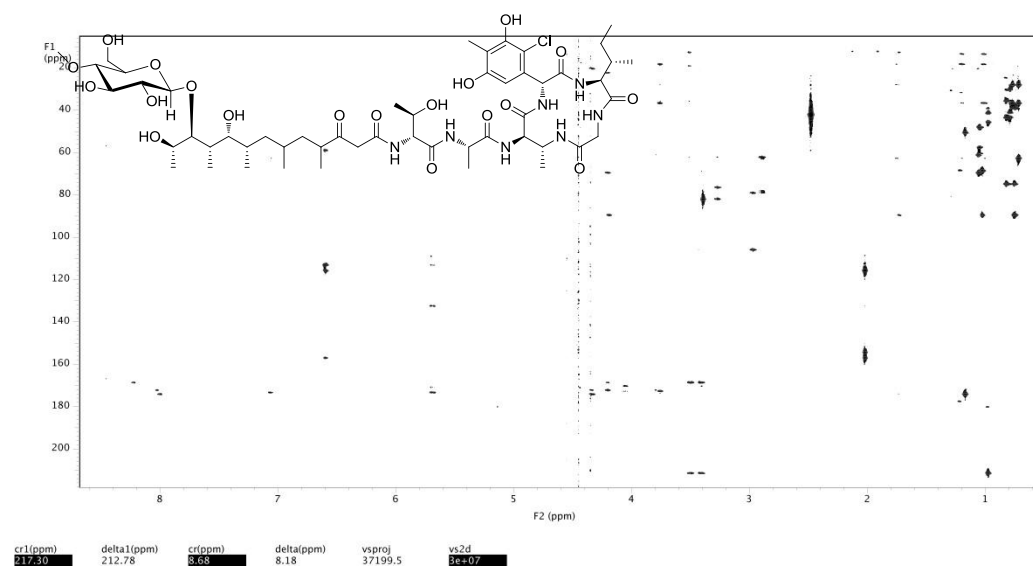

Figure S6.  $^1\text{H}$ - $^1\text{H}$  COSY spectrum of compound 1 in  $\text{DMSO-}d_6$ .

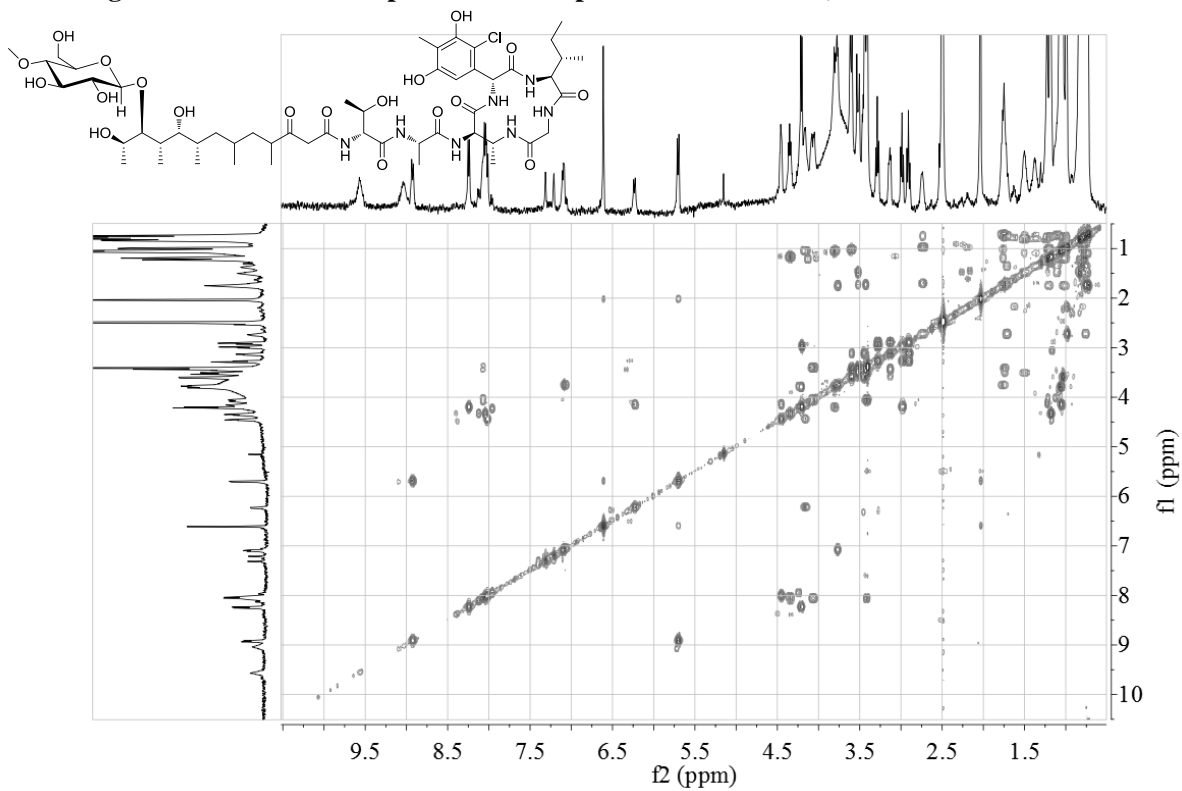

Figure S7. NOESY spectrum of compound 1 in  $\text{DMSO-}d_6$ .

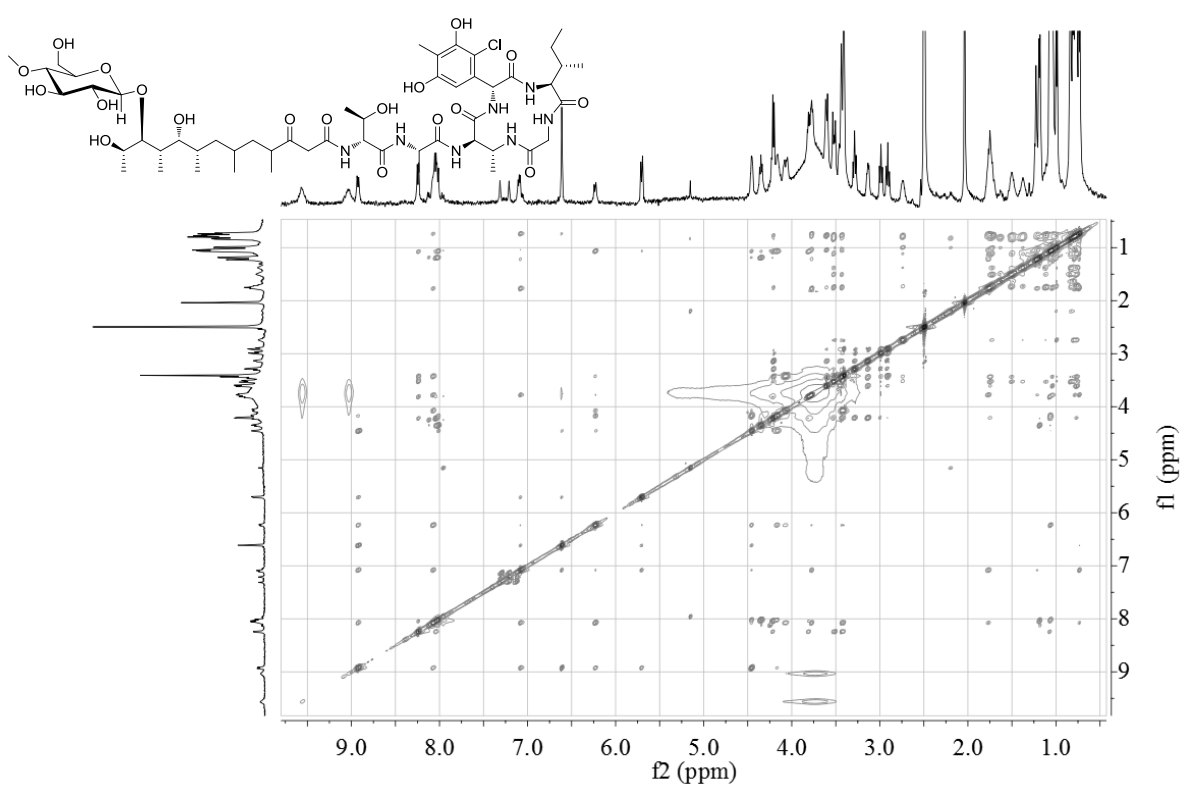

Figure S8. 1D TOCSY spectrum of compound 1 in CD<sub>3</sub>OD.

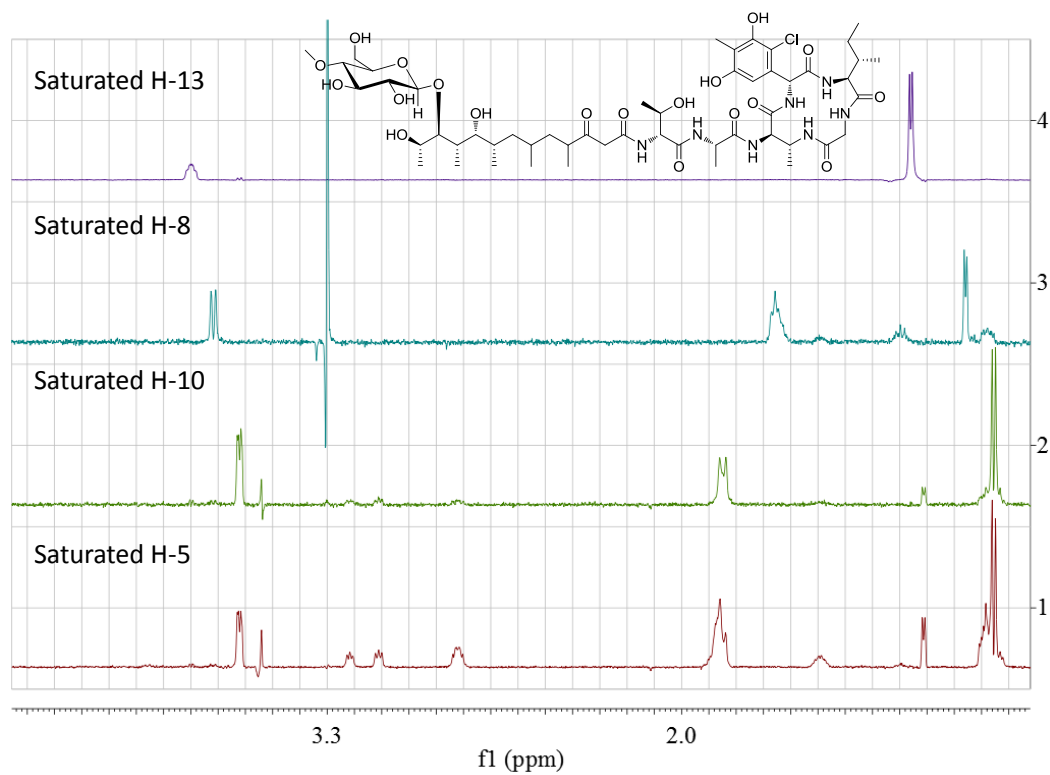

Figure S9. <sup>1</sup>H NMR spectrum of compound 2 in DMSO-*d*<sub>6</sub>.

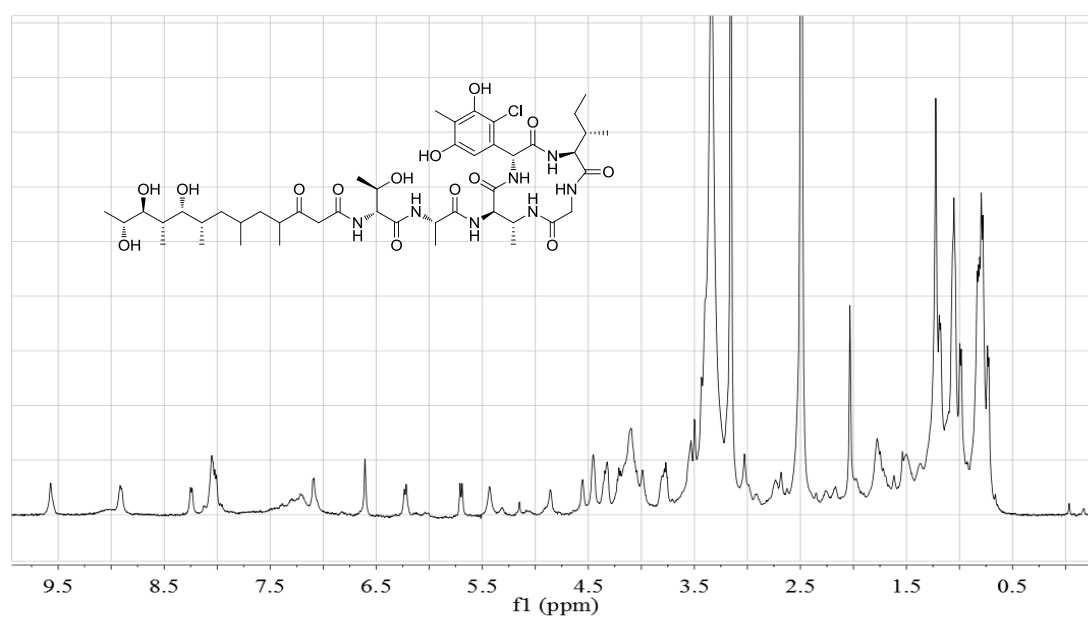

Figure S10. HSQC spectrum of compound 2 in DMSO-*d*<sub>6</sub>.

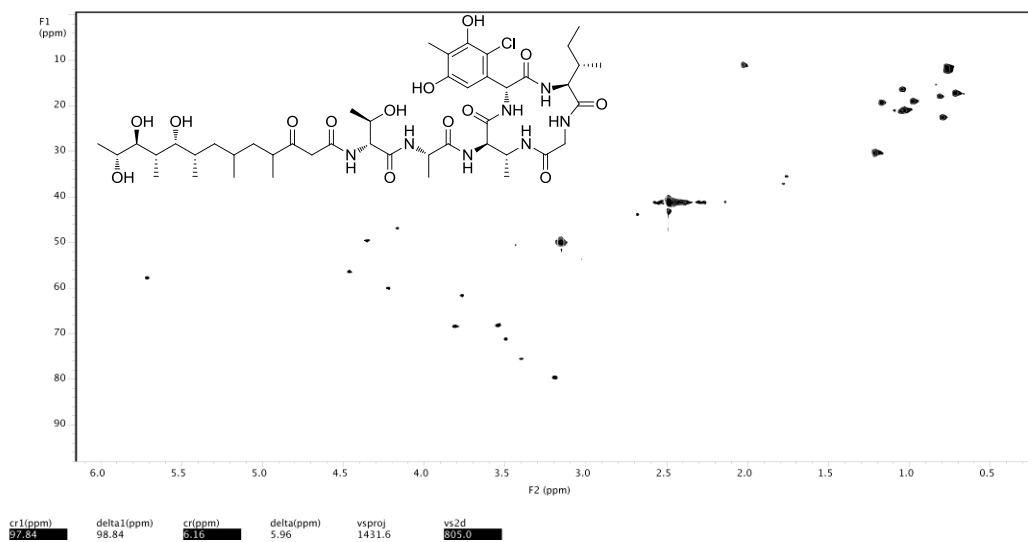

Figure S11. HMBC spectrum of compound 2 in DMSO-*d*<sub>6</sub>.

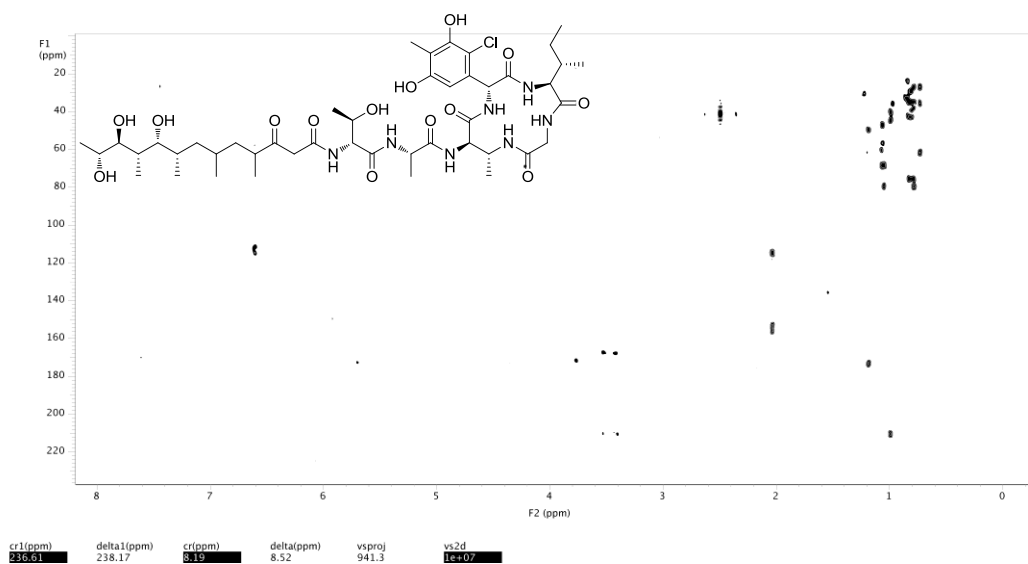



**Figure S12.**  $^1\text{H}$ - $^1\text{H}$  COSY spectrum of compound **2** in  $\text{DMSO-}d_6$ .

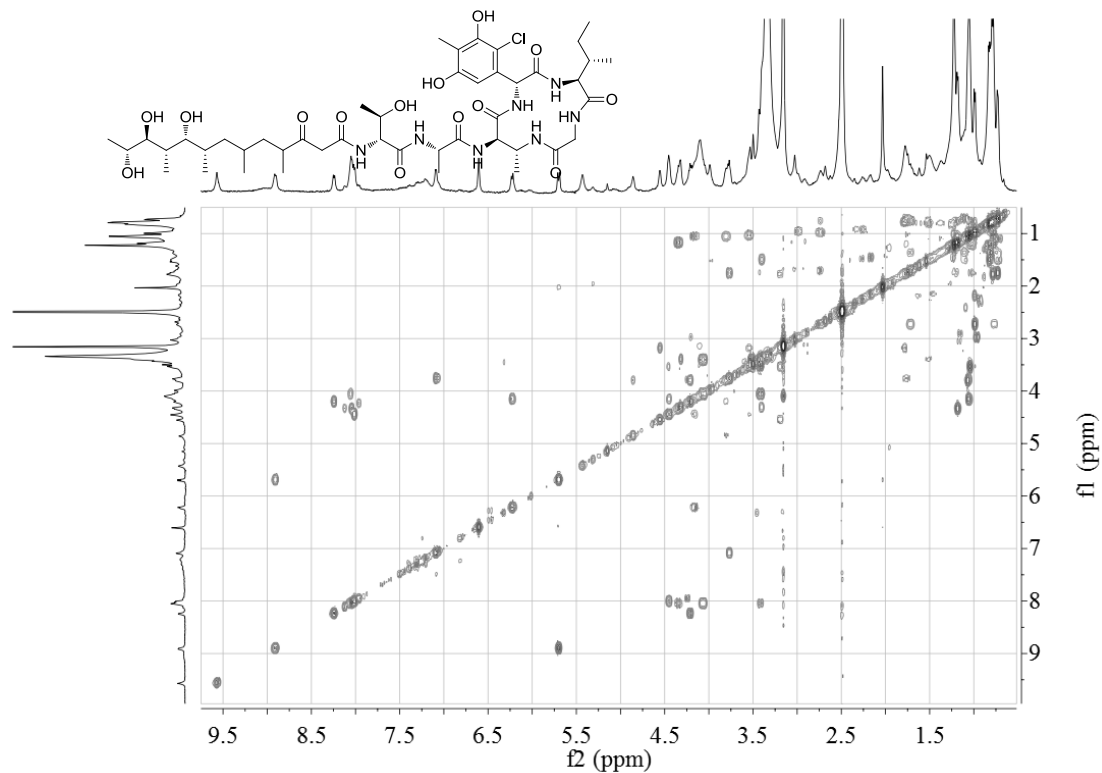

**Figure S13.** LC-MS Analysis of D/L-FDLA Derivatives.

Hydrolysate of **1** was reacted with L-FDLA (top) and D-FDLA (bottom), showing are extracted ion chromatographs.

A) L-Ala in **1**:  $m/z$  382  $[\text{M} - \text{H}]^-$

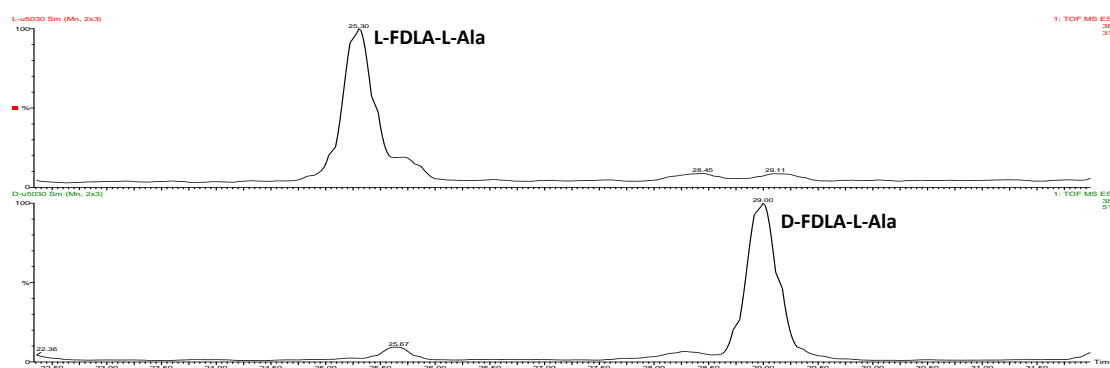

B) D-CIPh in 1:  $m/z$  524  $[M - H]^-$

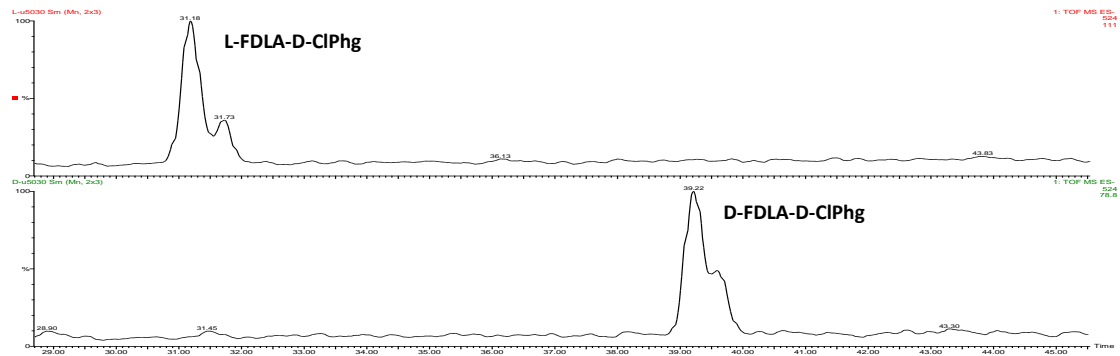

C) HPLC analysis of D/L-FDLA Derivatives for standard D-Phg

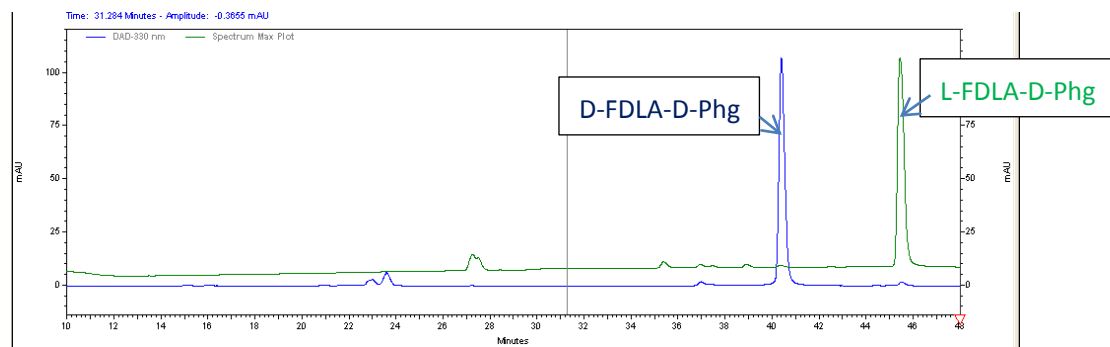

D) LC-MS analysis of D/L-FDLA Derivatives for standard L-3,5-Dihydroxyphenylglycine (DHPg)

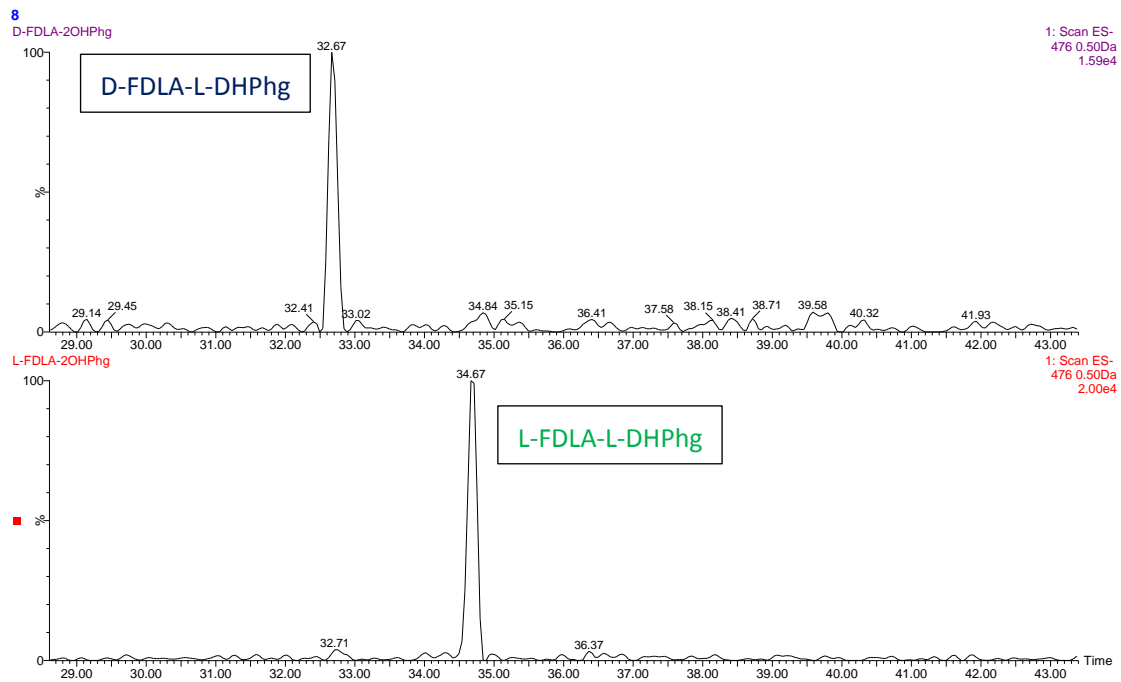

E) D-allo-Thr in **1**:  $m/z$  412  $[M - H]^-$

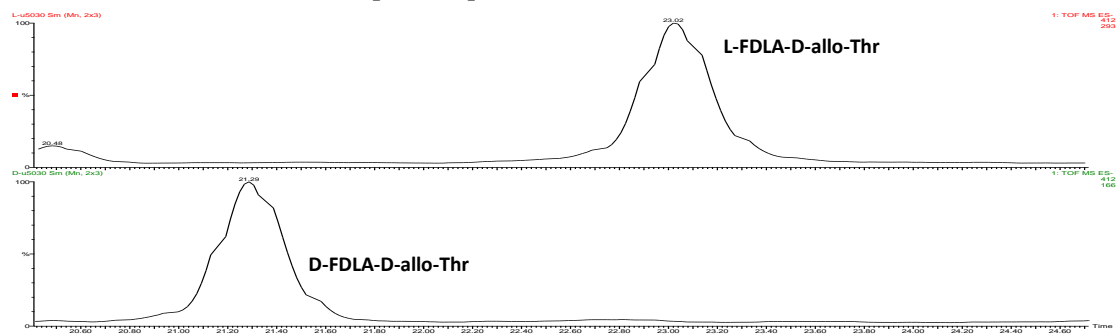

F) L-Ile in **1**:  $m/z$  424  $[M - H]^-$

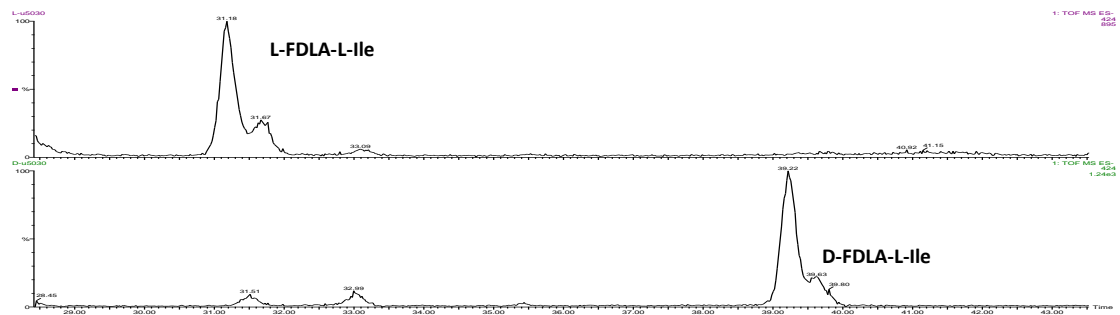

G) D-Dab in **1**:  $m/z$  705  $[M - H]^-$

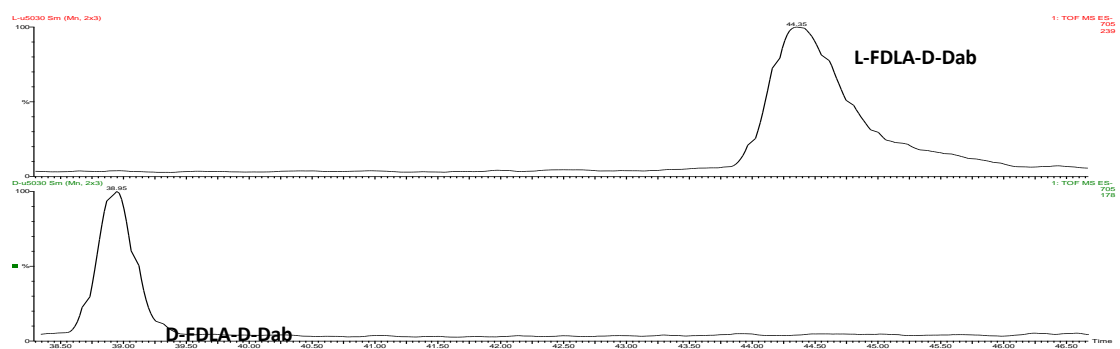

H) LC-MS analysis of D/L-FDLA Derivatives for standard 2*S*,3*S*-Dab and 2*S*,3*R*-Dab.

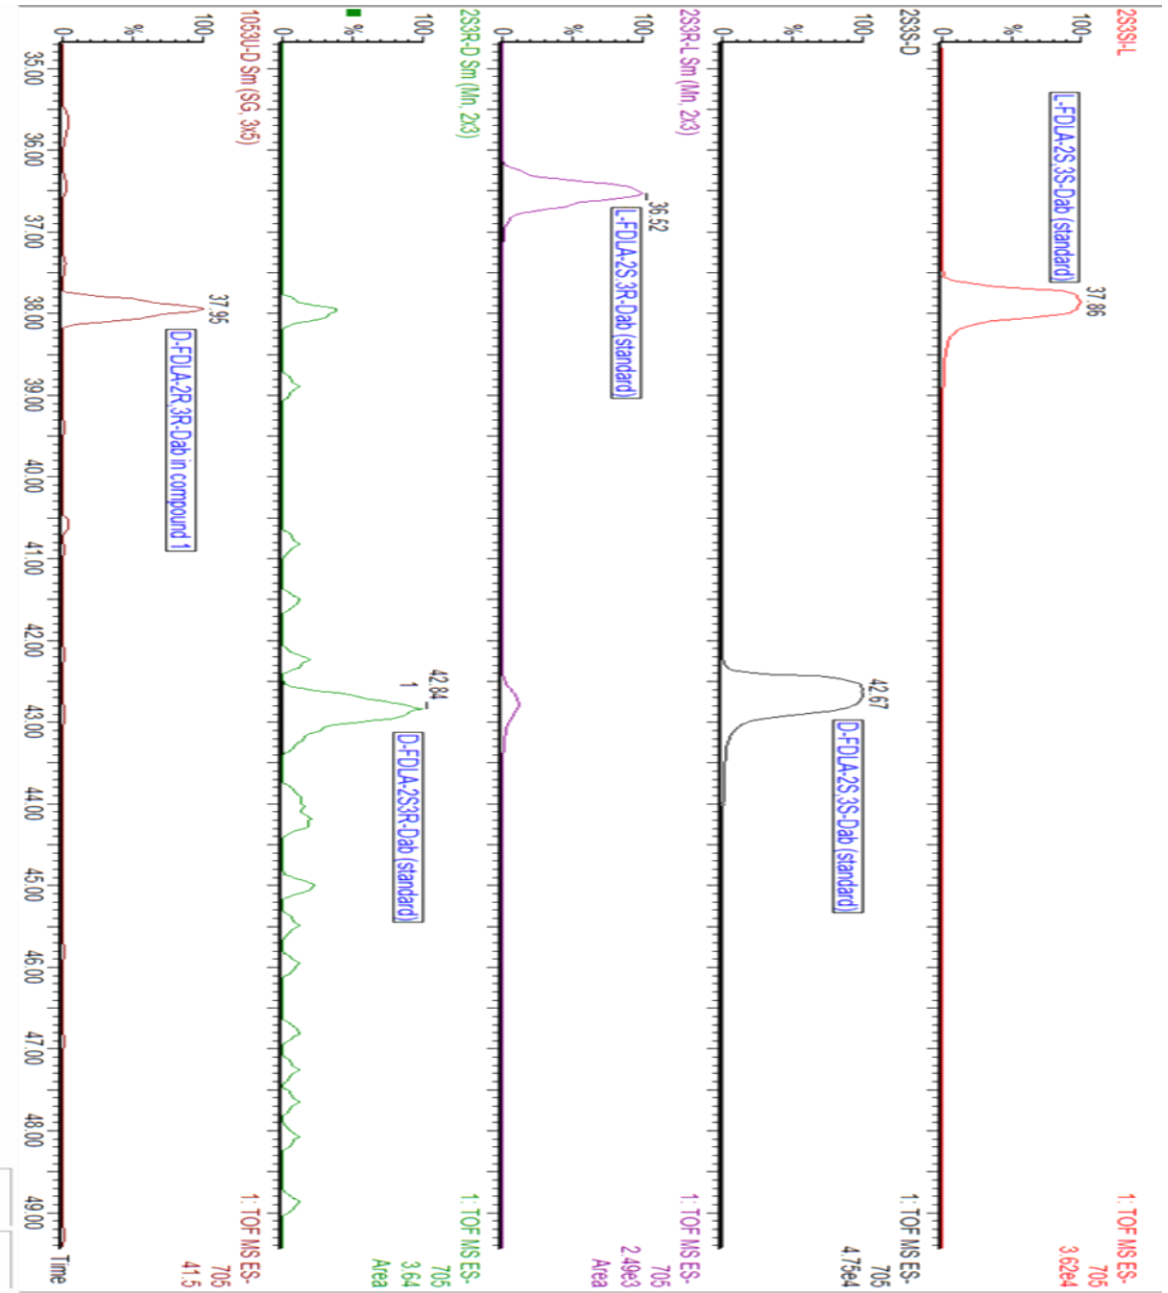

**Figure S14. LC-MS Analysis of L-FDAA Derivatives.**

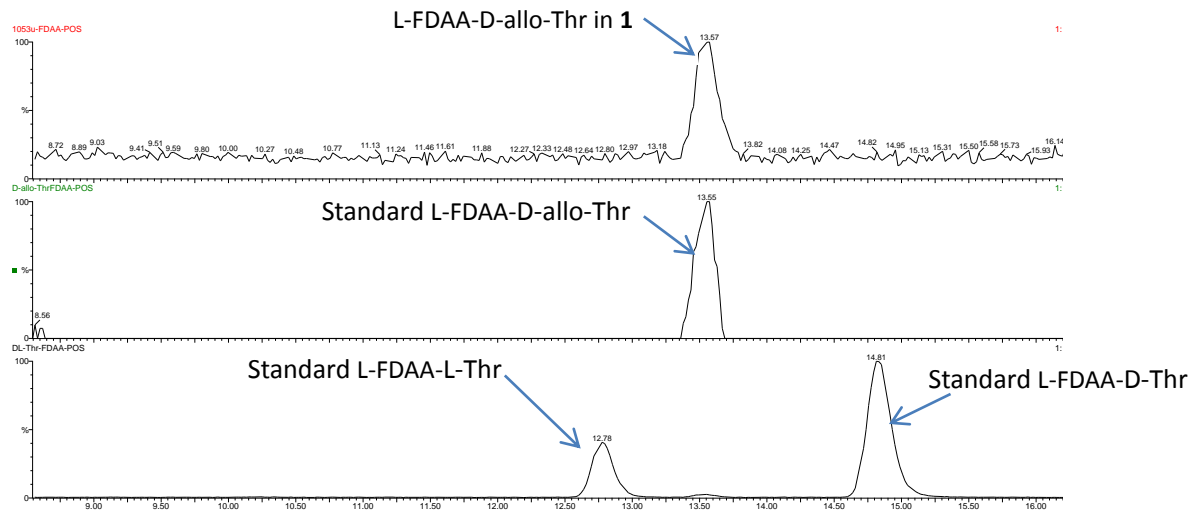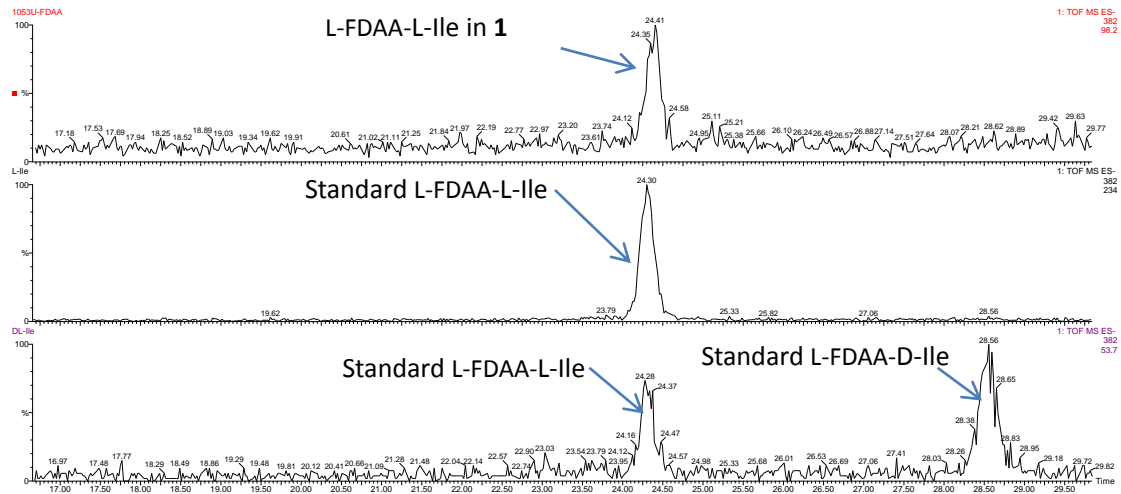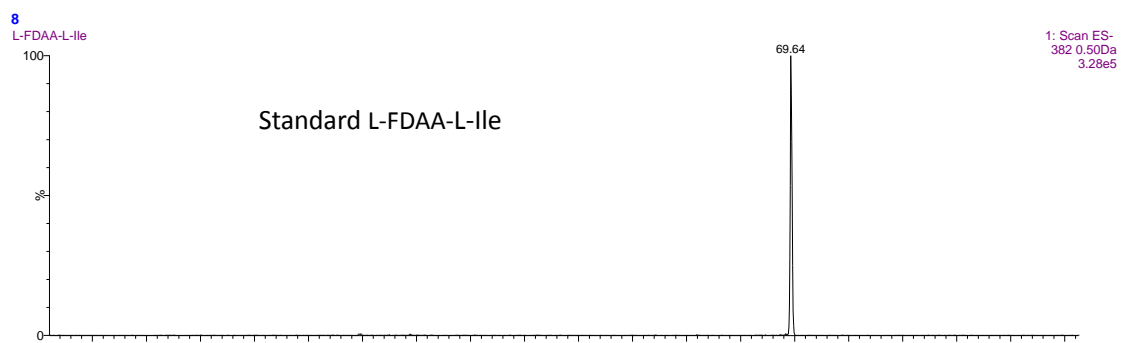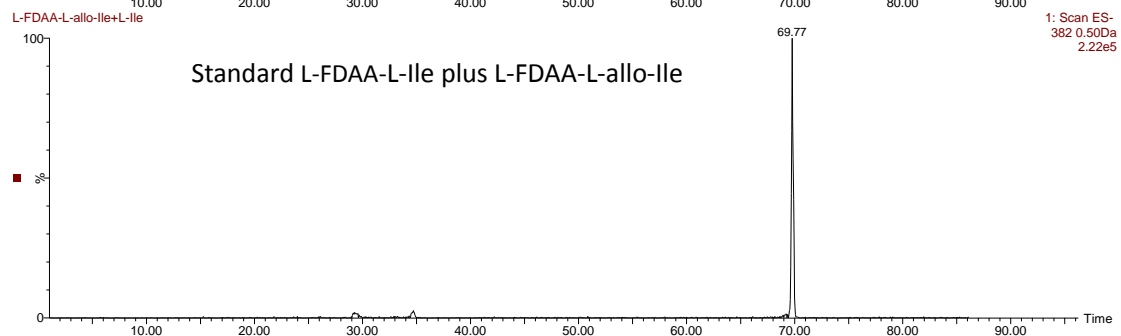

Figure S15. HRESIMS spectra of compounds 1 and 2.

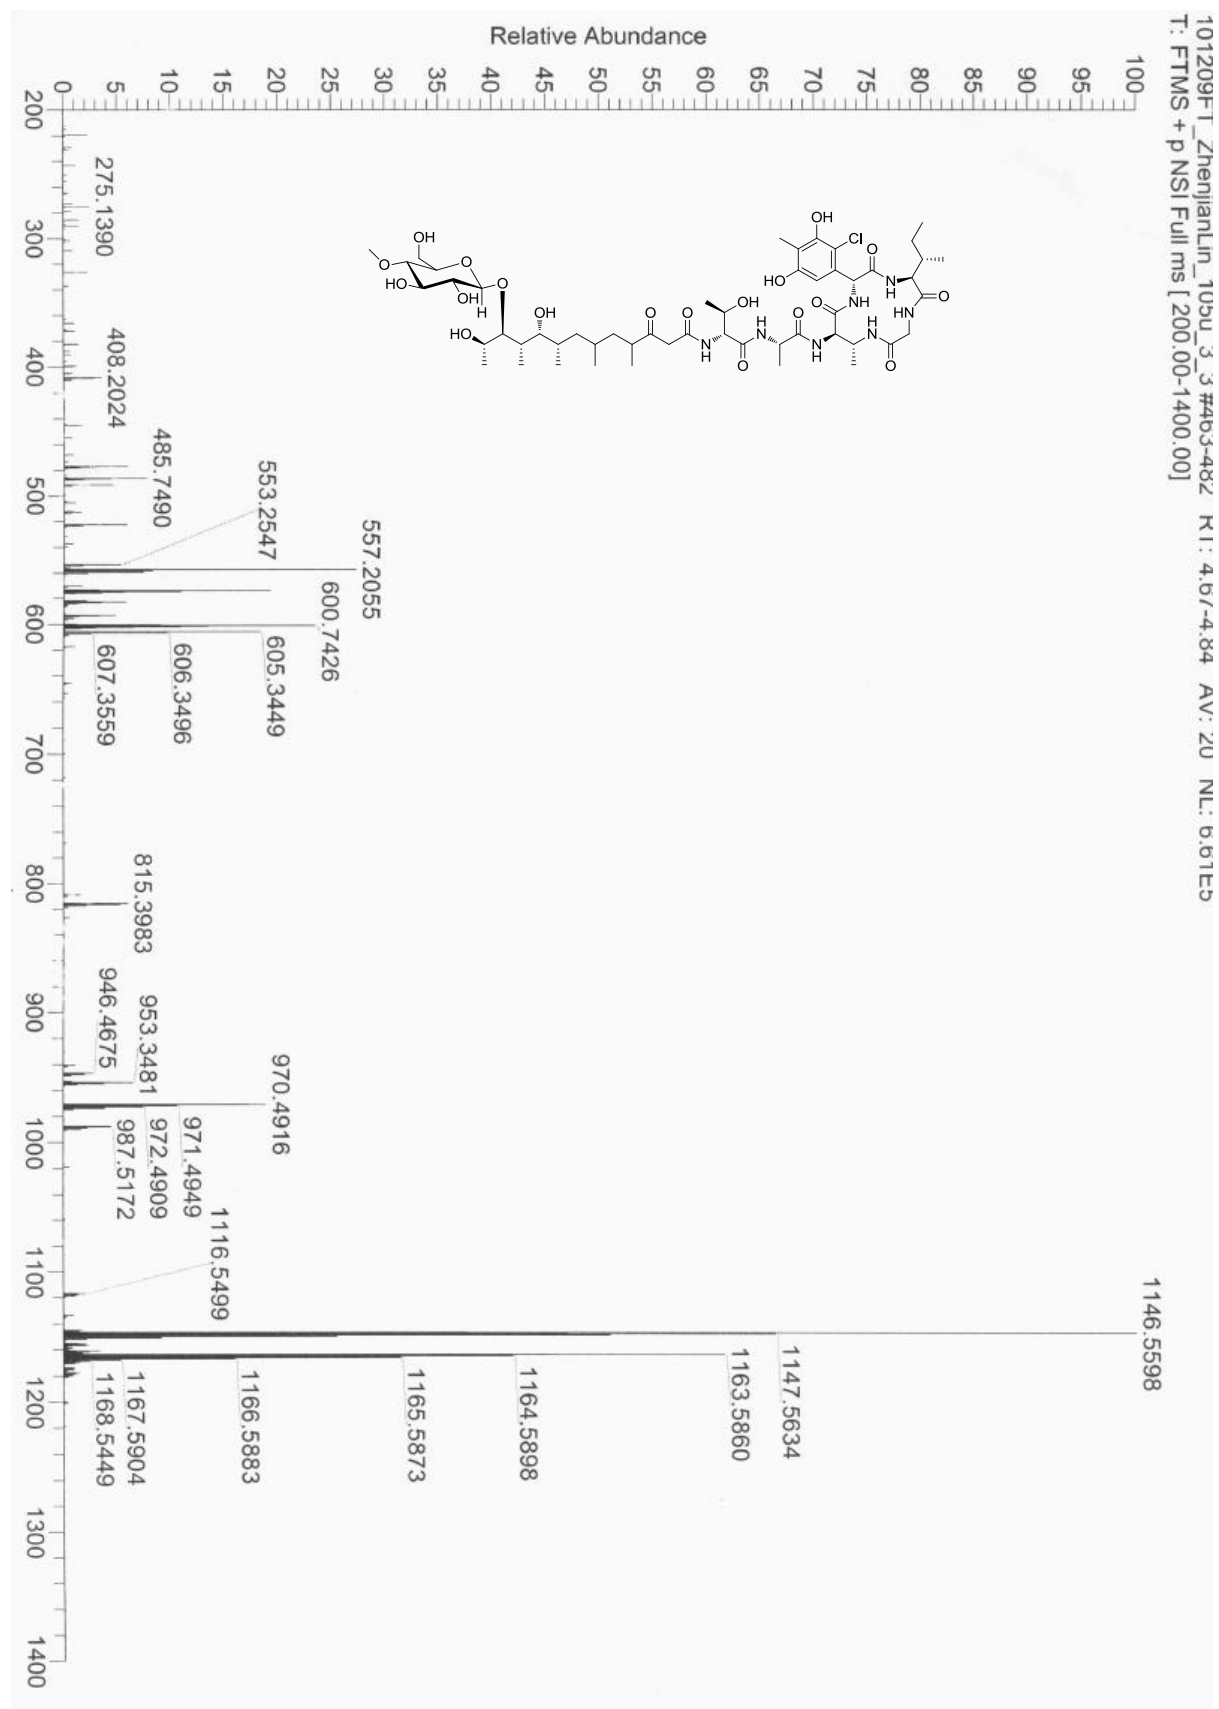

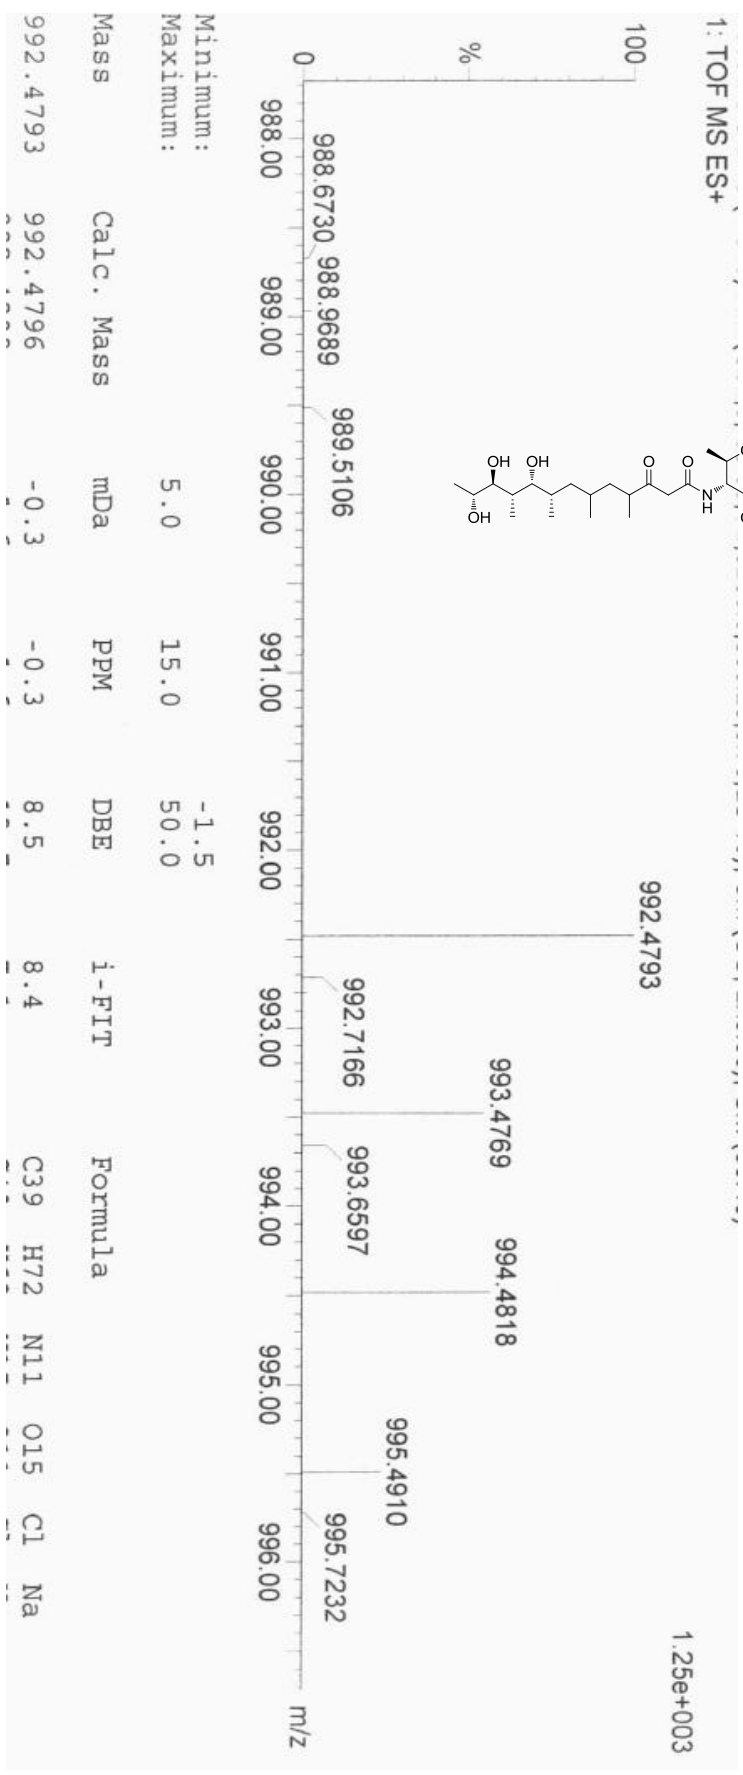

Figure S16.  $^1\text{H}$  NMR spectrum of FDLA derivatives of Phg and DHPg in  $\text{CD}_3\text{OD}-d_4$ .

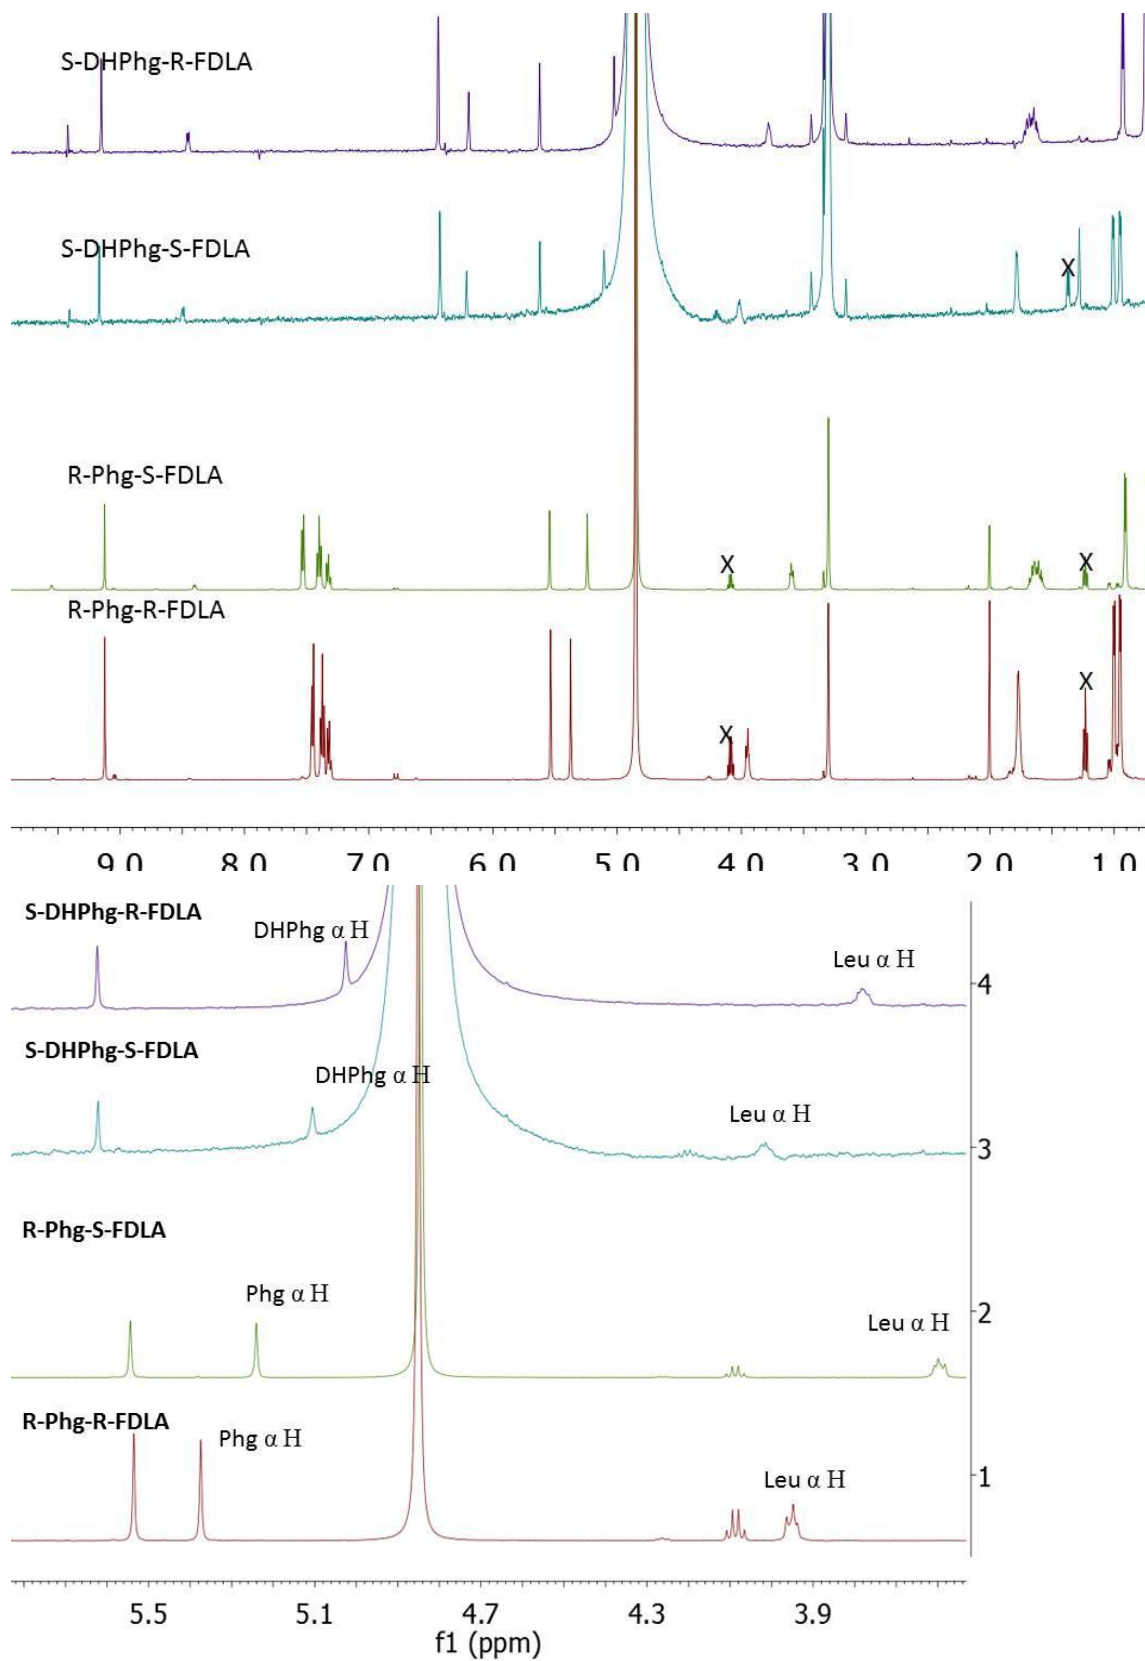



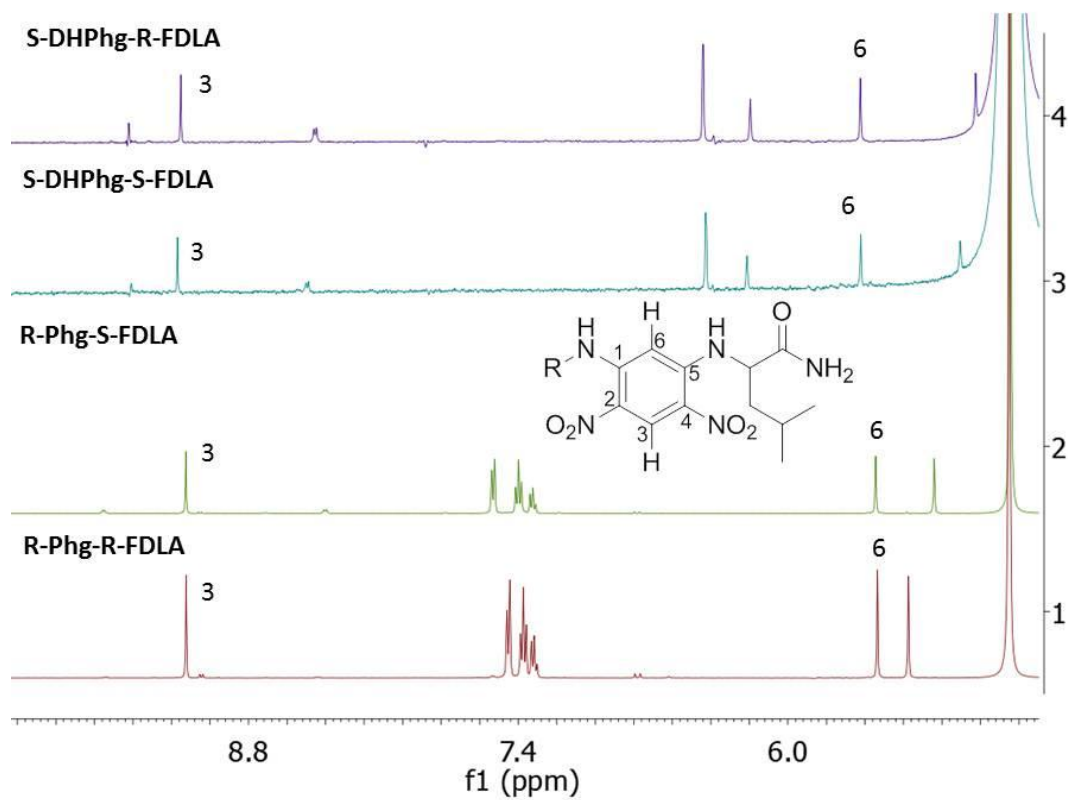

**Table S1. The chemical difference of the  $\alpha$  protons of the Leu and Phgs.**

|                       | S-DHPhg-R-FDLA | S-DHPhg-S-FDLA | $\Delta\delta_1$ | R-Phg-S-FDLA | R-Phg-R-FDLA | $\Delta\delta_2$ |
|-----------------------|----------------|----------------|------------------|--------------|--------------|------------------|
| $\alpha$ H-Leu (ppm)  | 3.7794         | 4.0153         | -0.2359          | 3.5955       | 3.9494       | -0.3539          |
| $\alpha$ H-Phgs (ppm) | 5.0252         | 5.1045         | -0.0793          | 5.2400       | 5.3738       | -0.1338          |
